# Supplementary material for: Circulating P2X7 Receptor Signaling Components as Diagnostic Biomarkers for Temporal Lobe Epilepsy
Source: MDPI journal article supplement (doi:10.3390/cells10092444), 2021-09-16
Supplement: s1 [file s1]

**Supplementary Table S3:** Plasma cytokine levels in wt and *P2X7*<sup>-/-</sup> mice post status epilepticus

| Cytokines/<br>Chemokines | Plasma             |                            |                              |                            |                               |                            |
|--------------------------|--------------------|----------------------------|------------------------------|----------------------------|-------------------------------|----------------------------|
|                          | Controls           |                            | Post-status epilepticus (8h) |                            | Post-status epilepticus (24h) |                            |
|                          | wt                 | <i>P2X7</i> <sup>-/-</sup> | wt                           | <i>P2X7</i> <sup>-/-</sup> | wt                            | <i>P2X7</i> <sup>-/-</sup> |
| IFN- $\gamma$            | 0.75 $\pm$ 0.42    | 0.47 $\pm$ 0.32            | 0.35 $\pm$ 0.15              | 0.35 $\pm$ 0.07            | 0.73 $\pm$ 0.2                | 0.79 $\pm$ 0.32            |
| IL-10                    | 33.33 $\pm$ 4.09   | 21.87 $\pm$ 1.29           | 28.5 $\pm$ 4.82              | 61.64 $\pm$ 27.97          | 459.62 $\pm$ 194.05           | 1700.38 $\pm$ 486.1        |
| IL-12p70                 | 64.07 $\pm$ 64.07  | Not detected               | Not detected                 | 29.65 $\pm$ 17.79          | 30.38 $\pm$ 8.16              | 41.74 $\pm$ 7.09           |
| IL-15                    | 39.37 $\pm$ 3.2    | 75.75 $\pm$ 34.35          | 16.99 $\pm$ 9.82             | 16.99 $\pm$ 9.83           | 63.47 $\pm$ 7.02              | 72.55 $\pm$ 10.41          |
| IL-17A/F                 | Not detected       | Not detected               | Not detected                 | Not detected               | 36.54 $\pm$ 18.73             | 49.32 $\pm$ 18.15          |
| IL-1 $\beta$             | 0.89 $\pm$ 0.4     | 0.72 $\pm$ 0.03            | 0.6 $\pm$ 0.13               | 0.75 $\pm$ 0.27            | 0.57 $\pm$ 0.14               | 0.81 $\pm$ 0.11            |
| IL-2                     | 0.65 $\pm$ 0.21    | 1.71 $\pm$ 0.42            | 0.9 $\pm$ 0.52               | 1.21 $\pm$ 0.27            | 2.31 $\pm$ 0.59               | 2.32 $\pm$ 0.49            |
| IL-27p28/IL-30           | 10.64 $\pm$ 7.19   | 2.09 $\pm$ 2.09            | 7.61 $\pm$ 4.02              | 2.25 $\pm$ 2.25            | 63.03 $\pm$ 56.24             | 16.79 $\pm$ 7.72           |
| IL-33                    | 0.86 $\pm$ 0.86    | 9.98 $\pm$ 9.37            | 2.63 $\pm$ 1.54              | 1.44 $\pm$ 0.68            | 0.97 $\pm$ 0.33               | 1.03 $\pm$ 0.62            |
| IL-4                     | 1.25 $\pm$ 1.19    | 0.05 $\pm$ 0.05            | 0.1 $\pm$ 0.06               | 0.7 $\pm$ 0.47             | 0.03 $\pm$ 0.03               | 0.04 $\pm$ 0.04            |
| IL-5                     | 9.88 $\pm$ 0.62    | 11.61 $\pm$ 6.45           | 17.28 $\pm$ 11.28            | 13.64 $\pm$ 8.54           | 6.75 $\pm$ 3.08               | 4.25 $\pm$ 1.14            |
| IL-6                     | 397.99 $\pm$ 28.59 | 376.01 $\pm$ 92.25         | 235.85 $\pm$ 39.54           | 828.59 $\pm$ 573.32        | 2156.3 $\pm$ 975.16           | 5507.76 $\pm$ 1160.05      |
| IL-9                     | Not detected       | Not detected               | Not detected                 | Not detected               | Not detected                  | Not detected               |
| IP-10                    | 427.4 $\pm$ 136.16 | 400.21 $\pm$ 255.16        | 235.78 $\pm$ 14.19           | 142.55 $\pm$ 36.57         | 133.58 $\pm$ 31.23            | 216.61 $\pm$ 82.6          |
| KC/GRO                   | 325.1 $\pm$ 85.06  | 233.63 $\pm$ 118.93        | 267.5 $\pm$ 51.42            | 551.66 $\pm$ 293.66        | 964.6 $\pm$ 242.61            | 2971.14 $\pm$ 141.66       |
| MCP-1                    | 69.53 $\pm$ 25.72  | 36.67 $\pm$ 11.66          | 39.67 $\pm$ 4.97             | 39.9 $\pm$ 9.22            | 52.03 $\pm$ 10.83             | 222.89 $\pm$ 54.12         |
| MIP-1 $\alpha$           | 1.27 $\pm$ 1.27    | Not detected               | 0.72 $\pm$ 0.72              | 13.85 $\pm$ 8.01           | 69.65 $\pm$ 28                | 93.02 $\pm$ 14.4           |
| MIP-2                    | 33.94 $\pm$ 7.98   | 24.84 $\pm$ 0.35           | 50.25 $\pm$ 2.05             | 241.35 $\pm$ 119.28        | 1951.63 $\pm$ 625.03          | 2650.89 $\pm$ 575.42       |
| TNF- $\alpha$            | 32.23 $\pm$ 5.76   | 15.92 $\pm$ 2.13           | 9.71 $\pm$ 0.63              | 59.75 $\pm$ 30.91          | 518.69 $\pm$ 222.41           | 484.38 $\pm$ 115.68        |

Data are given in pg/ml.
