# Supplementary material for: Circulating P2X7 Receptor Signaling Components as Diagnostic Biomarkers for Temporal Lobe Epilepsy
Source: MDPI journal article supplement (doi:10.3390/cells10092444), 2021-09-16
Supplement: s1 [file s1]

**Supplementary Table S2:** Hippocampal cytokine levels in wt and *P2X7*<sup>-/-</sup> mice post status epilepticus.

| Cytokines/<br>Chemokines | Hippocampus      |                            |                              |                            |                               |                            |
|--------------------------|------------------|----------------------------|------------------------------|----------------------------|-------------------------------|----------------------------|
|                          | Controls         |                            | Post-status epilepticus (8h) |                            | Post-status epilepticus (24h) |                            |
|                          | wt               | <i>P2X7</i> <sup>-/-</sup> | wt                           | <i>P2X7</i> <sup>-/-</sup> | wt                            | <i>P2X7</i> <sup>-/-</sup> |
| <b>IFN-γ</b>             | Not detected     | Not detected               | Not detected                 | Not detected               | Not detected                  | Not detected               |
| <b>IL-10</b>             | 6.74 ± 0.94      | 6.91 ± 0.04                | 6.5 ± 3.26                   | 9.37 ± 11.13               | 2.81 ± 2.36                   | 8.16 ± 4.14                |
| <b>IL-12p70</b>          | Not detected     | Not detected               | Not detected                 | Not detected               | Not detected                  | Not detected               |
| <b>IL-15</b>             | 628.08 ± 205.87  | 235.7 ± 52.26              | 275.78 ± 140.4               | 348.93 ± 267.55            | 711.54 ± 74.89                | 432.1 ± 95.08              |
| <b>IL-17A/F</b>          | 214.39 ± 64.67   | 141.46 ± 3.2               | 147.56 ± 40.32               | 243.96 ± 99.84             | 239.28 ± 33.68                | 214.48 ± 45.5              |
| <b>IL-1β</b>             | 1.08 ± 1.08      | 0.8 ± 0.11                 | 10.8 ± 2.86                  | 11 ± 4.26                  | 4.81 ± 1.77                   | 2.15 ± 1.04                |
| <b>IL-2</b>              | Not detected     | Not detected               | Not detected                 | Not detected               | Not detected                  | 2.93 ± 4.14                |
| <b>IL-27p28/IL-30</b>    | 30.67 ± 30.67    | Not detected               | 25.5 ± 36.07                 | 30.27 ± 18.08              | 95.15 ± 41.64                 | 24.72 ± 29.83              |
| <b>IL-33</b>             | 3371.34 ± 913.45 | 1831.63 ± 794.48           | 3147.49 ± 321.22             | 2448.56 ± 498.56           | 4156.3 ± 1046.85              | 3448.42 ± 1344.99          |
| <b>IL-4</b>              | 0.69 ± 0.69      | Not detected               | 0.54 ± 0.76                  | 0.22 ± 0.31                | 1.08 ± 1.52                   | 0.34 ± 0.47                |
| <b>IL-5</b>              | Not detected     | Not detected               | 0.76 ± 1.07                  | Not detected               | 2.66 ± 2.47                   | 3.94 ± 1.57                |
| <b>IL-6</b>              | 125.25 ± 47.17   | 1553.39 ± 1493.7           | 272.29 ± 63.1                | 505.62 ± 144.76            | 307.86 ± 171.24               | 391.3 ± 332.8              |
| <b>IL-9</b>              | 586.53 ± 265.49  | Not detected               | Not detected                 | 321.42 ± 265.12            | 991.79 ± 513.48               | 573.12 ± 513.99            |
| <b>IP-10</b>             | 103.07 ± 53.66   | 53.86 ± 5.16               | 736.82 ± 374.03              | 1701.84 ± 767.97           | 4581.05 ± 1784.95             | 2656.35 ± 1752.87          |
| <b>KC/GRO</b>            | 54.56 ± 20.02    | 47.78 ± 14.79              | 383.34 ± 83.02               | 1459.54 ± 626.74           | 141.24 ± 39.53                | 228.98 ± 108.97            |
| <b>MCP-1</b>             | 45.18 ± 0.39     | 28.78 ± 4.91               | 276.1 ± 37.65                | 630.69 ± 244.7             | 348.36 ± 221.88               | 266.45 ± 212.02            |
| <b>MIP-1α</b>            | 117.78 ± 35.41   | 27.1 ± 27.1                | 1001.03 ± 187.91             | 1115.32 ± 240.05           | 285.35 ± 122.15               | 262.32 ± 150.86            |
| <b>MIP-2</b>             | 33.59 ± 6.55     | 12.04 ± 2.79               | 278.18 ± 49.33               | 719.95 ± 217.76            | 96.1 ± 35.83                  | 202.44 ± 133.53            |
| <b>TNF-α</b>             | 1.92 ± 1.1       | 9 ± 9                      | 10.84 ± 3.77                 | 9.58 ± 3.2                 | 8.1 ± 5.39                    | 5.74 ± 2                   |

Data are given in pg/ml.
